# Supplementary material for: First-in-Human Phase I/II ICONIC Trial of the ICOS Agonist Vopratelimab Alone and with Nivolumab: ICOS-High CD4 T-Cell Populations and Predictors of Response
Source: Oxford University Press journal article supplement (doi:10.1158/1078-0432.ccr-21-4256), 2022-05-05
Supplement: ccr-21-4256-sfs1.docx [file ccr-21-4256-sfs1.docx]

Figure S1. **Patient flow diagram**

Enrollment

Assessed for eligibility (n=242)

Allocated to vopratelimab + nivolumab (n=131)

- Received intervention (n=131)
- Did not receive intervention (n=0)

Discontinued intervention (n=128)

- Disease progression [106]
- Adverse event [6]
- Investigator decision [3]
- Withdrawal of consent [6]
- Death [2]
- Other [5]

Excluded (n=24)

Discontinued intervention (n=70)

- Disease progression [64]
- Adverse event [2]
- Investigator decision [2]
- Withdrawal of consent [2]
- Death [0]
- Other [0]

Allocated to vopratelimab (n=70)

- Received intervention (n=70)
- Did not receive intervention (n=0)

Allocation

Analysis

Follow-Up

Allocated (n=201)

Safety Set (n=131)

- Excluded (n=0)

Response evaluable set (n=119)

- Excluded (n=12)

Analyzed for PMBC ICOS-hi (n=34)

- Excluded (n=0)

Analyzed for TIS (n=60)

- Excluded (n=0)

Safety Set (n=70)

- Excluded (n=0)

Response evaluable set (n=68)

- Excluded (n=2)

Analyzed for PMBC ICOS-hi (n=10)

- Excluded (n=0)

Analyzed for TIS (n=29)

- Excluded (n=0)
