# Supplementary material for: First-in-Human Phase I/II ICONIC Trial of the ICOS Agonist Vopratelimab Alone and with Nivolumab: ICOS-High CD4 T-Cell Populations and Predictors of Response
Source: Oxford University Press journal article supplement (doi:10.1158/1078-0432.ccr-21-4256), 2022-05-05

**Figure S3 Legend**: Target engagement by vopratelimab (JTX-2011) was assessed on peripheral blood CD4 T cells following dosing with vopratelimab. A target engagement score of ≥ 70%, indicated by the dotted line, was deemed saturating in our assay. Data are population level analysis and are plotted as mean ± SD (standard deviation).

**Figure S3. Vopratelimab (JTX-2011) saturates ICOS on peripheral T cells at doses above 0.1 mg/kg q3w**


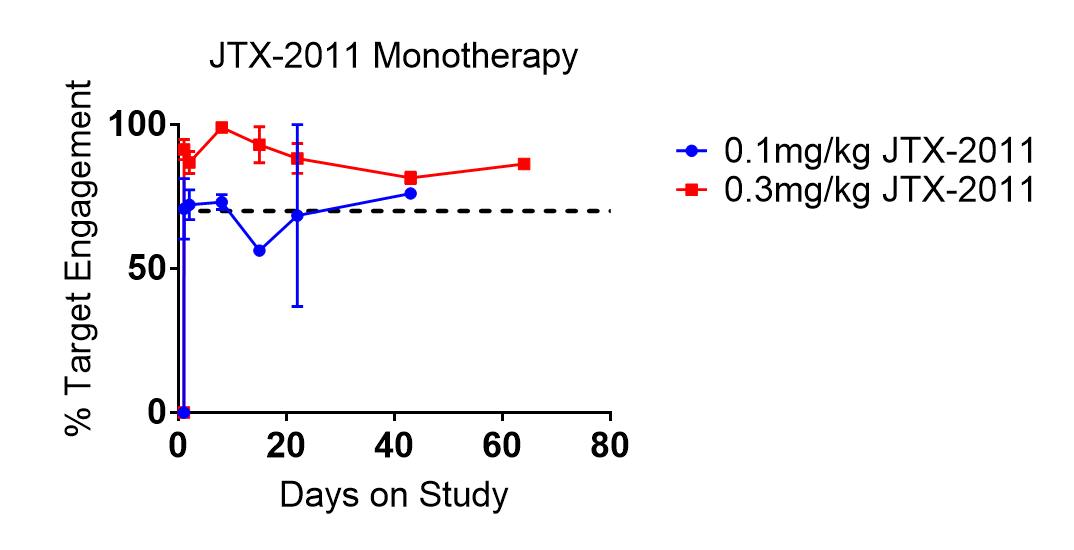

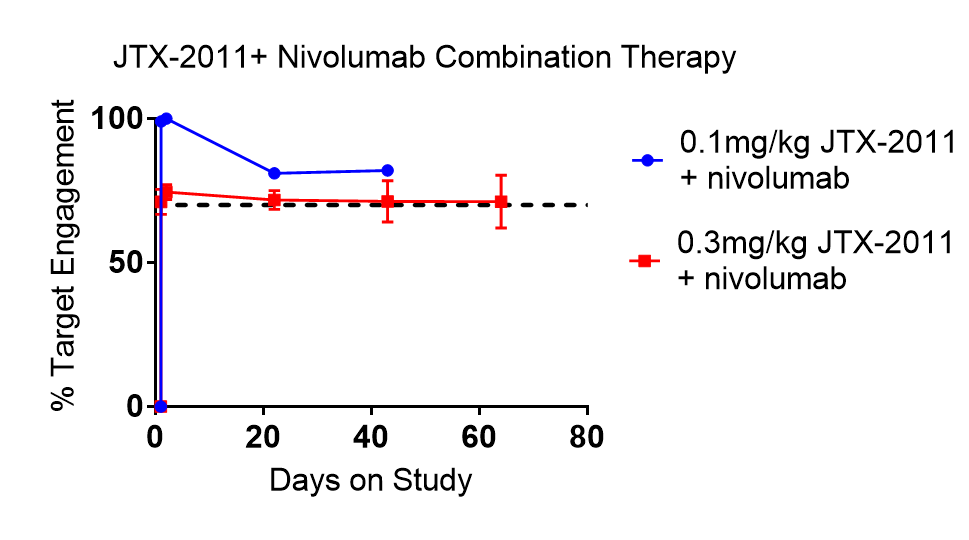

Supplement: ccr-21-4256-sfs3.docx [file ccr-21-4256-sfs3.docx]
