# Supplementary material for: First-in-Human Phase I/II ICONIC Trial of the ICOS Agonist Vopratelimab Alone and with Nivolumab: ICOS-High CD4 T-Cell Populations and Predictors of Response
Source: Oxford University Press journal article supplement (doi:10.1158/1078-0432.ccr-21-4256), 2022-05-05

**Figure S5 Legend**: Kaplan Meier curve demonstrating progression free survival for patients treated with vopratelimab (A) or vopratelimab in combination with nivolumab (B). Kaplan Meier curve demonstrating overall survival for patients treated with vopratelimab (C) or vopratelimab in combination with nivolumab (D). Gastric (solid yellow line); NSCLC, non-small cell lung cancer (dotted yellow line); TNBC, triple negative breast cancer (solid blue line); HNSCC, head and neck squamous cell carcinoma (solid purple line); Other (dotted black line); All tumor types (solid gray line). Data cut date: July 22, 2020.

**Figure S5. Progression Free and Overall Survival by Tumor Type and Treatment**


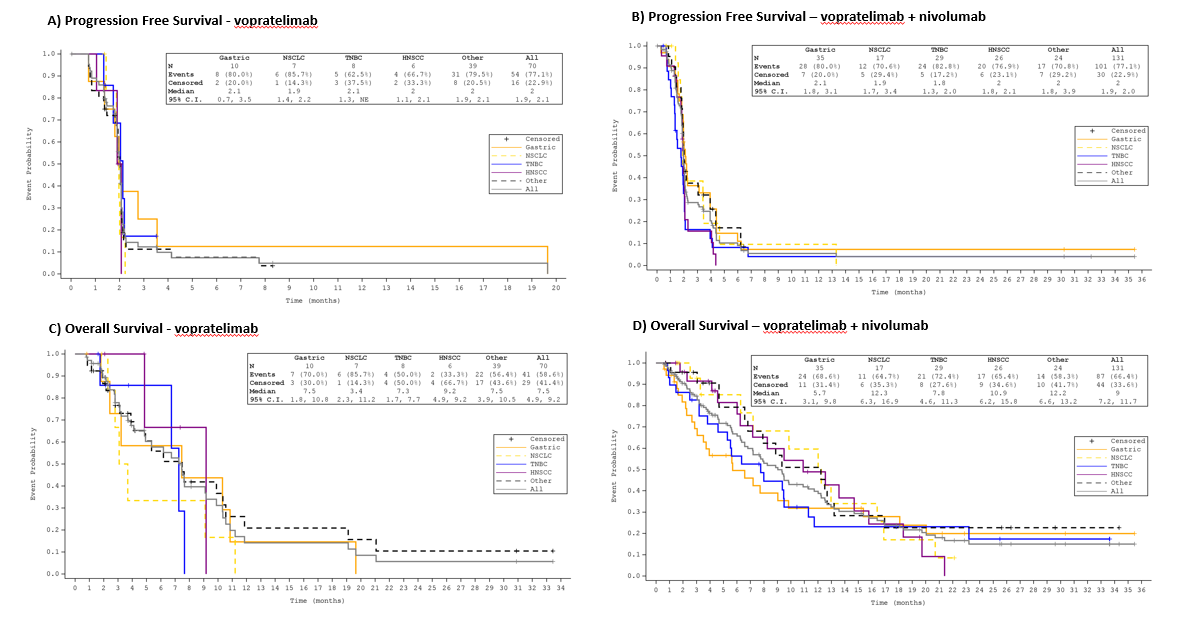

Supplement: ccr-21-4256_supplementary_data_fs5_suppfs5.docx [file ccr-21-4256_supplementary_data_fs5_suppfs5.docx]
