# Supplementary material for: First-in-Human Phase I/II ICONIC Trial of the ICOS Agonist Vopratelimab Alone and with Nivolumab: ICOS-High CD4 T-Cell Populations and Predictors of Response
Source: Oxford University Press journal article supplement (doi:10.1158/1078-0432.ccr-21-4256), 2022-05-05
Supplement: ccr-21-4256_supplementary_data_fs9_suppfs9.docx [file ccr-21-4256_supplementary_data_fs9_suppfs9.docx]

**Figure S9 Legend:** Kaplan Meier curve demonstrating overall survival analysis of patients from ICONIC with TISvopra positive (n=13; dashed red curve) and TISvopra negative (n=49; solid gray curve) scores who were not used to establish the TISvopra threshold. Data cut date: July 22, 2020.

**Figure S9. Overall Survival analysis excluding patients used to establish TISvopra threshold**

**
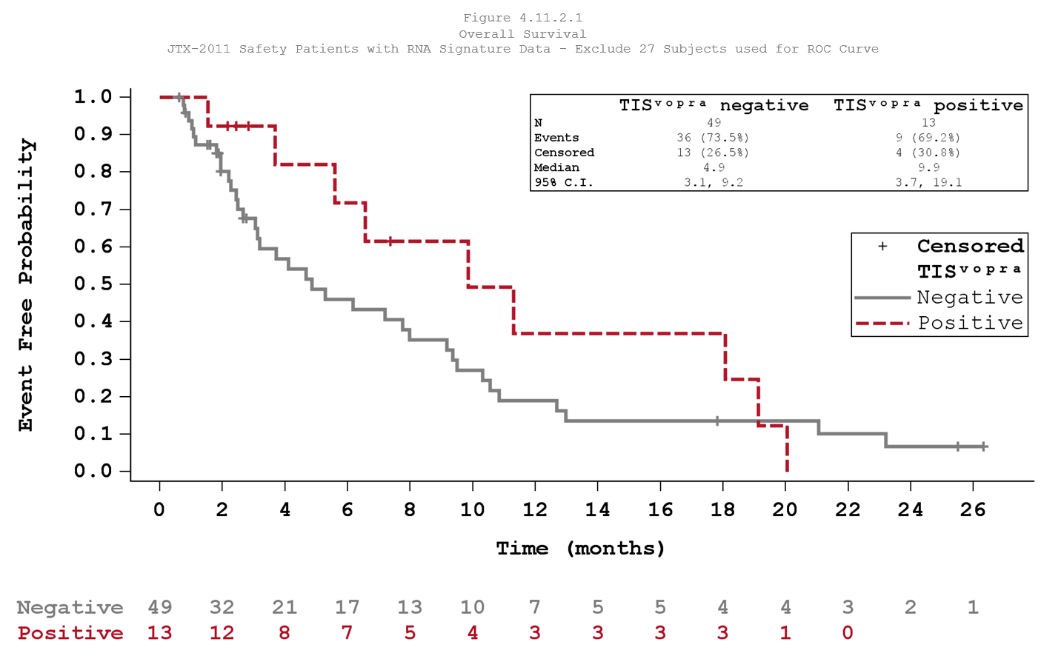
**
