# Supplementary figures and images for: First-in-Human Phase I/II ICONIC Trial of the ICOS Agonist Vopratelimab Alone and with Nivolumab: ICOS-High CD4 T-Cell Populations and Predictors of Response
Source: Oxford University Press journal article supplement (doi:10.1158/1078-0432.ccr-21-4256), 2022-05-05

**Figure S10. TIS sample disposition**


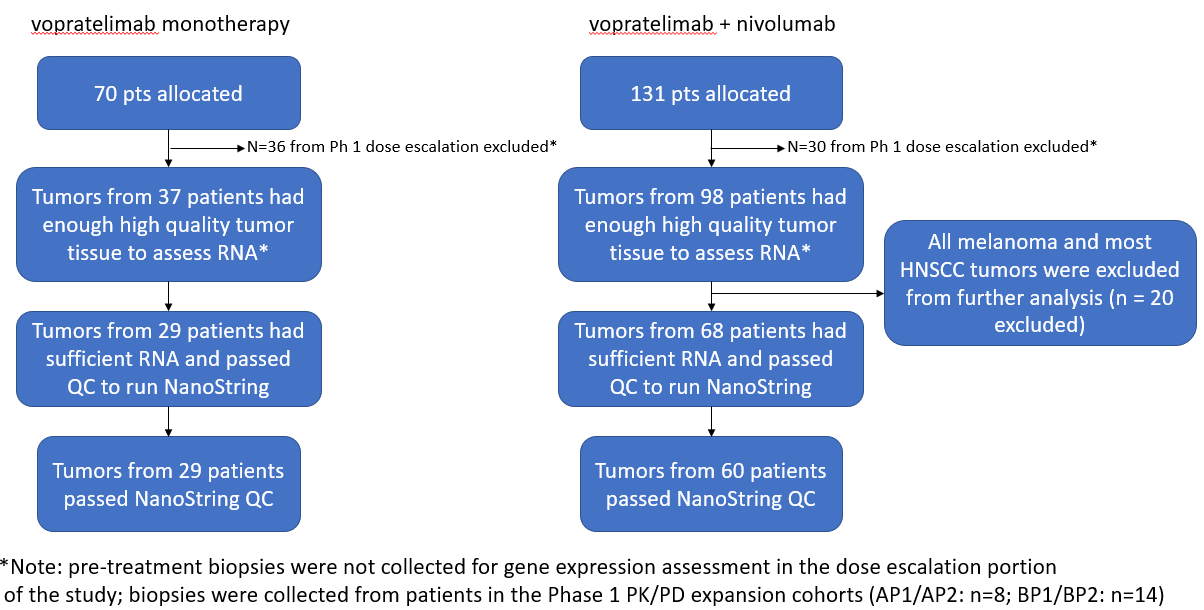

Supplement: ccr-21-4256-sfs10.docx [file ccr-21-4256-sfs10.docx]
